# Supplementary material for: Acceptability and Willingness to Use HIV Pre-Exposure Prophylaxis among Female Sex Workers in Lagos State, Nigeria: A Cross-Sectional Study
Source: Research Square preprint supplement (doi:10.21203/rs.3.rs-7066966/v1), 2025-07-17
Supplement: Supplementary file 1 [file 255d00953bf31141fad32319.docx]

**STUDY QUESTIONNAIRE**

**ACCEPTABILITY, WILLINGNESS, AND USE OF PRE-EXPOSURE PROPHYLAXIS TO PREVENT HIV TRANSMISSION AMONG FEMALE SEX WORKERS IN LAGOS STATE.**

**Dear Respondent,**

You are invited to participate in a research study exploring the **acceptability, willingness, and use of pre-exposure prophylaxis (PrEP)** for HIV prevention among female sex workers in Lagos State, Nigeria. This study seeks to generate evidence that can inform HIV prevention strategies and improve access to preventive healthcare services.

This research has been reviewed and approved by the Lagos University Teaching Hospital Health Research Ethics Committee (LUTH-HREC Approval No: ADM/DCST/HREC/APP/5093).

Participation is entirely voluntary. Your responses will be treated with strict confidentiality. We sincerely appreciate your time and honest contributions to this study.

**SECTION A: SOCIO-DEMOGRAPHIC OF RESPONDENTS**

I would like to begin by asking a few questions about you.

1. What is your age at last birthday? _________(years)
2. What is your current marital status? ____________
3. What is your religion? Christianity Islam Traditional
4. What is your tribe? Hausa Igbo Yoruba Others
5. What is your highest level of education? None Primary Secondary Tertiary
6. Do you have regular paying job? Yes No
7. What occupation is your major source of getting money? ________
8. What age did you start sex trade? _________
9. What type of sex trade do you engage in? Anal Oral Vaginal
10. On average, how many clients do you have in a month? _______

**SECTION B: KNOWLEDGE OF HIV/AIDS AND PrEP**

**KNOWLEDGE OF HIV/AIDS**

Now, I would like to ask you about HIV/AIDS.

1. HIV is the virus that can lead to AIDS. Yes No Do not know
2. Can people get HIV from mosquito bites? Yes No Do not Know
3. Can people get HIV by sharing food with a person who has HIV? Yes No Do not know
4. People who look healthy can have HIV? Yes No Do not know
5. Only people who look sick can spread the HIV/AIDS virus. Yes No Do not know
6. Can people reduce their chance of getting HIV by using a condom every time they have sex? Yes No Do not know
7. Can people become infected with HIV by having unprotected oral sex? Yes No Do not know
8. Having another sexually transmitted disease like gonorrhea or herpes increases a person’s risk of becoming infected with HIV. Yes No Do not Know
9. There are drugs available to treat HIV that can lengthen the life of a person infected with the virus. Yes No Do not know
10. There is a cure for AIDS. Yes No Do not know

**KNOWLEDGE OF PrEP**

1. There are drugs people can use to prevent getting HIV. Yes No Do not know
2. PrEP is used after exposure to HIV Yes No Do not know
3. Pre-exposure Prophylaxis is an injection Yes No Do not know
4. Pre-exposure prophylaxis prevents all sexually transmitted diseases? Yes No Do not know
5. Pre-exposure prophylaxis prevents only HIV Yes No Do not know
6. Pre-exposure Prophylaxis is used more than once a day Yes No Do not know
7. Only HIV negative people can use Pre-Exposure Prophylaxis Yes No Do not Know
8. Pre-exposure Prophylaxis provides long-term immunity to HIV Yes No Do not know
9. Pre-exposure Prophylaxis is protective from the first day of use Yes No Do not know
10. Pre-exposure prophylaxis does not have side effect Yes No Do not know

**SECTION C: ACCEPTABILITY OF PrEP**

PrEP is a drug taken by someone who is HIV negative and is at risk of HIV to protect themselves from contracting HIV.

|  | Would you consider accepting PrEP as a method to prevent HIV for if it is made available in Nigeria and | Very likely | Likely | Undecided | Not likely | Very Unlikely |
| --- | --- | --- | --- | --- | --- | --- |
| 1 | It is free |  |  |  |  |  |
| 2 | It is safe |  |  |  |  |  |
| 3 | It is more than ninety per cent effective. |  |  |  |  |  |
| 4 | It is a once daily pill |  |  |  |  |  |
| 5 | It is once monthly intramuscular injection |  |  |  |  |  |
| 6 | It is a vaginal cream |  |  |  |  |  |

**SECTION D: WILLINGNESS TO USE PrEP**

The following questions asks you if you are willing to use PrEP. and what will influence your willingness to use PrEP. I will read the questions and the responses to you to choose the most appropriate response that describes how you feel.

|  | How likely would you be to take PrEP if | Definitely will | Probably will | Not sure | Probably will not | Definitely will not |
| --- | --- | --- | --- | --- | --- | --- |
| 1 | You have access to free counselling on PrEP |  |  |  |  |  |
| 3 | It has immediate side effects |  |  |  |  |  |
| 4 | It has long term effect on your health |  |  |  |  |  |
| 5 | You must take a pill every day |  |  |  |  |  |
| 6 | It is available at pharmacy and you do not need prescription |  |  |  |  |  |
| 7 | You must pay for the drug |  |  |  |  |  |
| 8 | You must see a healthcare worker before you get the drug |  |  |  |  |  |
| 9 | You have to go HIV clinics to access the drug |  |  |  |  |  |

**SECTION E: USE OF PrEP**

I am going to ask you about PrEP use.

|  |  | 1=Yes |
| --- | --- | --- |
| 1 | Have you ever been offered oral PrEP before | Yes  No |
| 2 | Are you currently using PrEP | Yes  No |
| 3 | Have you ever taken oral PrEP before? | Yes  No |
| 4 | If you have taken oral PrEP before, why did you decide to start? | I am sexually active  I feel that I am at risk for HIV  I have multiple sexual partners  I have clients who I believe could be HIV positive  I have clients who do not want to use condoms  (Mark all that apply) |
| 5 | Does/did your main partner (non-sex work partner) know that you are taking oral PrEP? | Yes  No |
|  | Does/did your clients know that you are taking oral PrEP? | Yes  No |

For Current PrEP users

| 6 | If you are still taking oral PrEP, what is reason for continuing to take it? | I am sexually active  I feel that I am at risk for HIV  If you are still taking oral PrEP,  I have multiple sexual partners  I have clients who I believe could be HIV positive  I have clients who do not want to use condoms  Other  (Mark all that apply) |
| --- | --- | --- |
