# Supplementary material for: Acceptability and Willingness to Use HIV Pre-Exposure Prophylaxis among Female Sex Workers in Lagos State, Nigeria: A Cross-Sectional Study
Source: Research Square preprint supplement (doi:10.21203/rs.3.rs-7066966/v1), 2025-07-17
Supplement: Supplementary file 2 [file 5b9c22a52bbb9f7e09ebc1f8.docx]

**INTERVIEW GUIDE**

**ACCEPTABILITY, WILLINGNESS, AND USE OF PRE-EXPOSURE PROPHYLAXIS TO PREVENT HIV TRANSMISSION AMONG FEMALE SEX WORKERS IN LAGOS STATE.**

Interview guide for acceptability, willingness and use Pre-exposure prophylaxis (PrEP) to prevent HIV transmission among female sex workers (FSW) in Lagos state, Nigeria.

| **Objectives** | **Prompts** |
| --- | --- |
| **Introduction/Greeting** | - Good day, how are you doing today - [Establish rapport and ensure comfort before proceeding] |
| **Knowledge of PrEP** | - Have you heard of PrEP before now? - What do you know about PrEP? - How did you learn about PrEP? - [If unfamiliar, provide brief explanation before continuing] |
| **Acceptability of PrEP** | - Suppose that PrEP is at least 90% effective in preventing HIV when taken daily. How likely would you be to take PrEP if it were available for free? - What about if you have to pay for it - Would accept PrEP if it made available as an injection - What about if it a vaginal cream - [ explore What factors would influence your decision to use PrEP?] |
| **Willingness to use PrEP** | - Would you be willing to take PrEP if it were provided by a government clinic and you had to go to the clinic for the drug? - *[If no]* Why not? - What if you had to wait for at least two hours before you could get the drug?   *[If unwilling]* Why do you think it's not worth the wait?   - What if you had to take a screening test every time before you could get the drug? - What about if it had effects on your health after prolonged use? - What would make you more willing to use PrEP services? |
| **Use of PrEP** | Do you currently use PrEP?   - *[If yes]* Can you tell me why you decided to use PrEP? - *[If yes]* Do you prefer to use it daily or only when you need it? Can you tell me why? - *[If no]* What would need to change for you to consider using PrEP? |
| **Closing** | - Is there anything else about PrEP that you would like to discuss? - Do you have any questions for me? - Thank you for your time and participation. |

**A Note to remember for Interviewer**

- Use probes like "Can you tell me more about that?" or "What do you mean by...?" to encourage elaboration
- Maintain non-judgmental language throughout
- Allow for natural conversation flow while ensuring all topics are covered
- Be sensitive to participant comfort and pause if needed
- Provide information about PrEP and where to access it
